# Supplementary material for: Enhancing the seawater desalination performance of multilayer reduced graphene oxide membranes by introducing in-plane nanopores: a molecular dynamics simulation study
Source: Royal Society of Chemistry journal article supplement (doi:10.1039/d3cp02967k), 2024-01-01

## **Supporting Information**

### **Enhancing the Seawater Desalination Performance of Multilayer Reduced Graphene Oxide Membranes by Introducing in-Plane Nanopores: A Molecular Dynamics Simulation Study**

**Table S1.** Lennard-Jones parameters and partial atomic charges of atoms

| <b>atom</b>                                    | <b><math>\sigma</math> (Å)</b> | <b><math>\epsilon</math> (kcal/mol)</b> | <b>charge (<math>q</math>)</b> |
|------------------------------------------------|--------------------------------|-----------------------------------------|--------------------------------|
| <b>O</b><br>(H <sub>2</sub> O)                 | 3.5365                         | 0.1521                                  | -0.834                         |
| <b>H</b><br>(H <sub>2</sub> O)                 | 0.0000                         | 0.0460                                  | 0.417                          |
| <b>Na</b>                                      | 2.5860                         | 0.1046                                  | +1                             |
| <b>Cl</b>                                      | 4.4020                         | 0.1046                                  | -1                             |
| <b>CA</b><br>(sp <sup>2</sup> carbon)          | 3.5500                         | 0.0700                                  | 0                              |
| <b>CT</b><br>(C in epoxy)                      | 3.5000                         | 0.0659                                  | 0.14                           |
| <b>OS</b><br>(O in epoxy)                      | 2.9000                         | 0.1400                                  | -0.28                          |
| <b>CF</b><br>(C bonded with phenolic hydroxyl) | 3.5500                         | 0.0700                                  | 0.15                           |
| <b>OH</b><br>(O in phenolic hydroxyl)          | 3.0700                         | 0.1699                                  | -0.585                         |
| <b>HO</b><br>(H in phenolic hydroxyl)          | 0.0000                         | 0.0000                                  | 0.435                          |
| <b>C</b><br>(C in carboxyl)                    | 3.7500                         | 0.1049                                  | 0.52                           |
| <b>OH2</b><br>(O of -OH in carboxyl)           | 3.0000                         | 0.1699                                  | -0.53                          |
| <b>O_3</b><br>(=O in carboxyl)                 | 2.9600                         | 0.2100                                  | -0.44                          |
| <b>HO2</b><br>(H of -OH in carboxyl)           | 0.0000                         | 0.0000                                  | 0.45                           |

**Figure S1.** Initial configuration of the rGO, r1NPGO, r2NPGO, r4NPGO and r1NPGO-3nm monolayers (a), and side-view of the resulting three-layer membranes (b). The orange, red, and white spheres represent carbon atoms, oxygen atoms and hydrogen atoms, respectively.

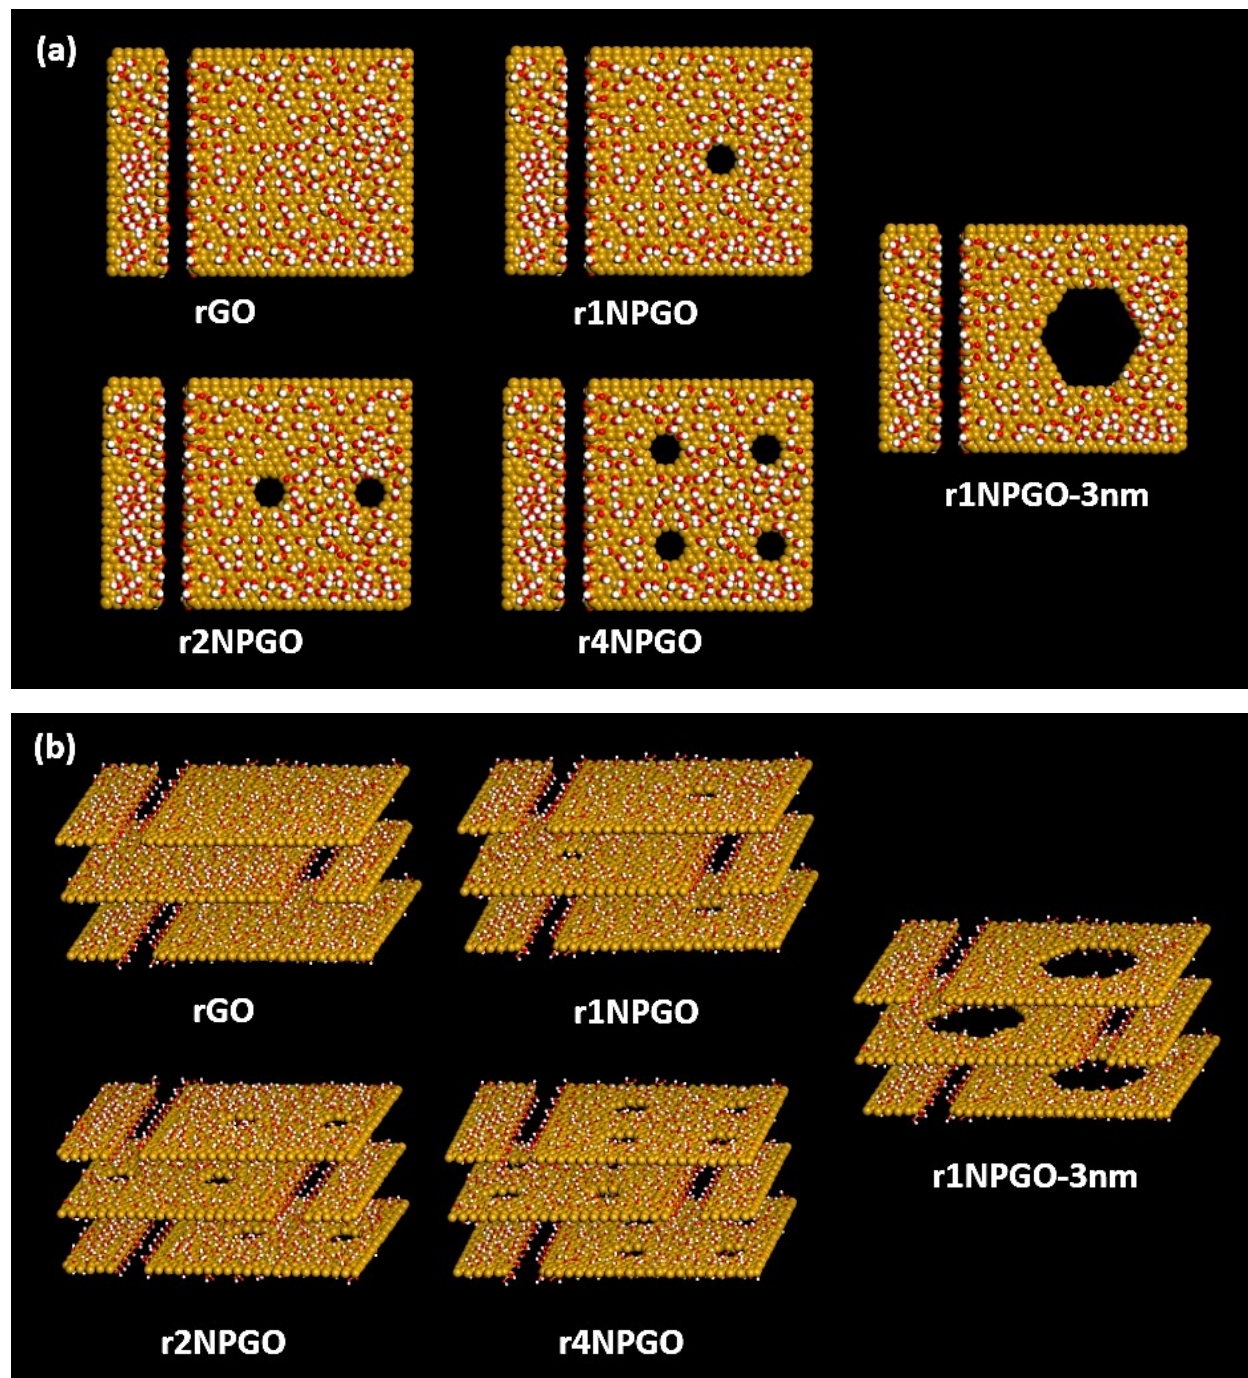

**Figure S2.** Number of water molecules in pure water box that are transferred from the feed side to permeate side as a function of time at 200 MPa for rGO, r1NPGO, r2NPGO, r4NPGO and r1NPGO-3nm membranes.

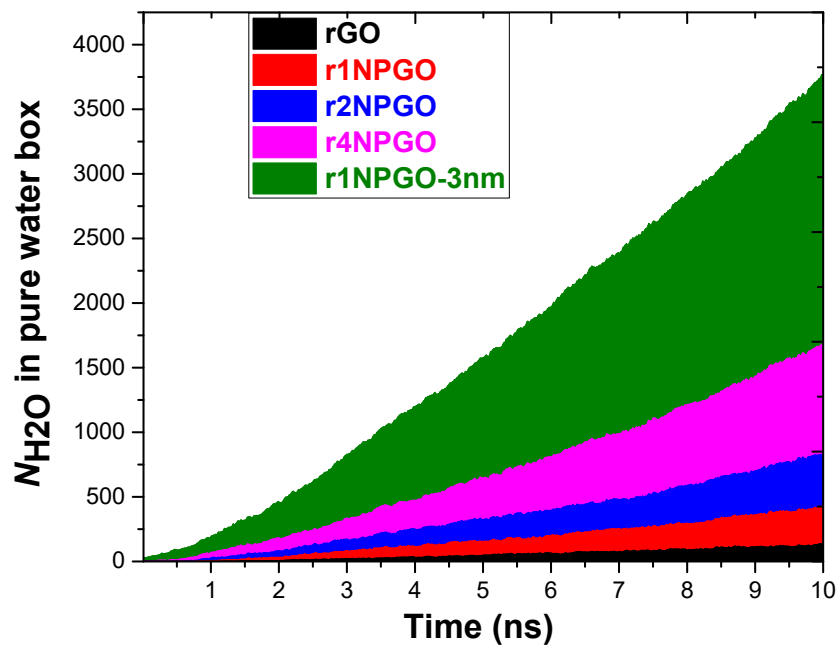

**Figure S3.** Two-dimensional density distribution of  $\text{Na}^+$  ions inside (a) rGO, (b) r1NPGO, (c) r2NPGO, (d) r4NPGO, and (e) r1NPGO-3nm membranes at 10 ns. The white dashed lines show the approximate range of the three-layer membranes.

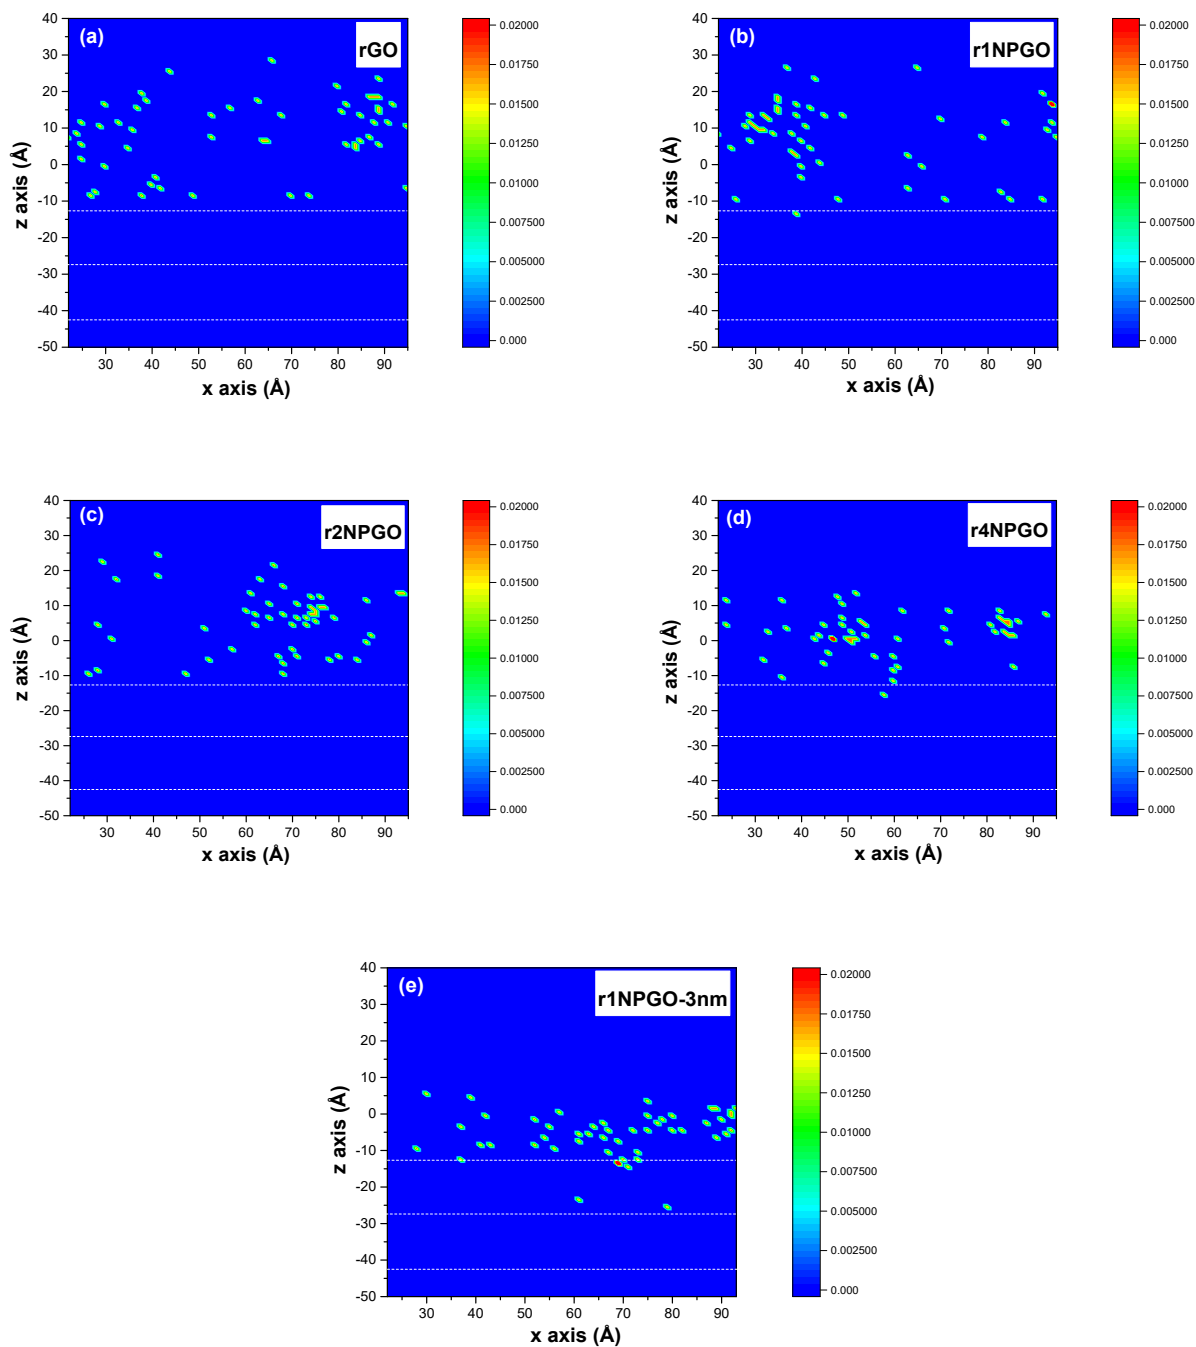

**Figure S4.** Two-dimensional density distribution of Cl<sup>-</sup> ions inside (a) rGO, (b) r1NPGO, (c) r2NPGO, (d) r4NPGO, and (e) r1NPGO-3nm membranes at 10 ns. The white dashed lines show the approximate range of the three-layer membranes.

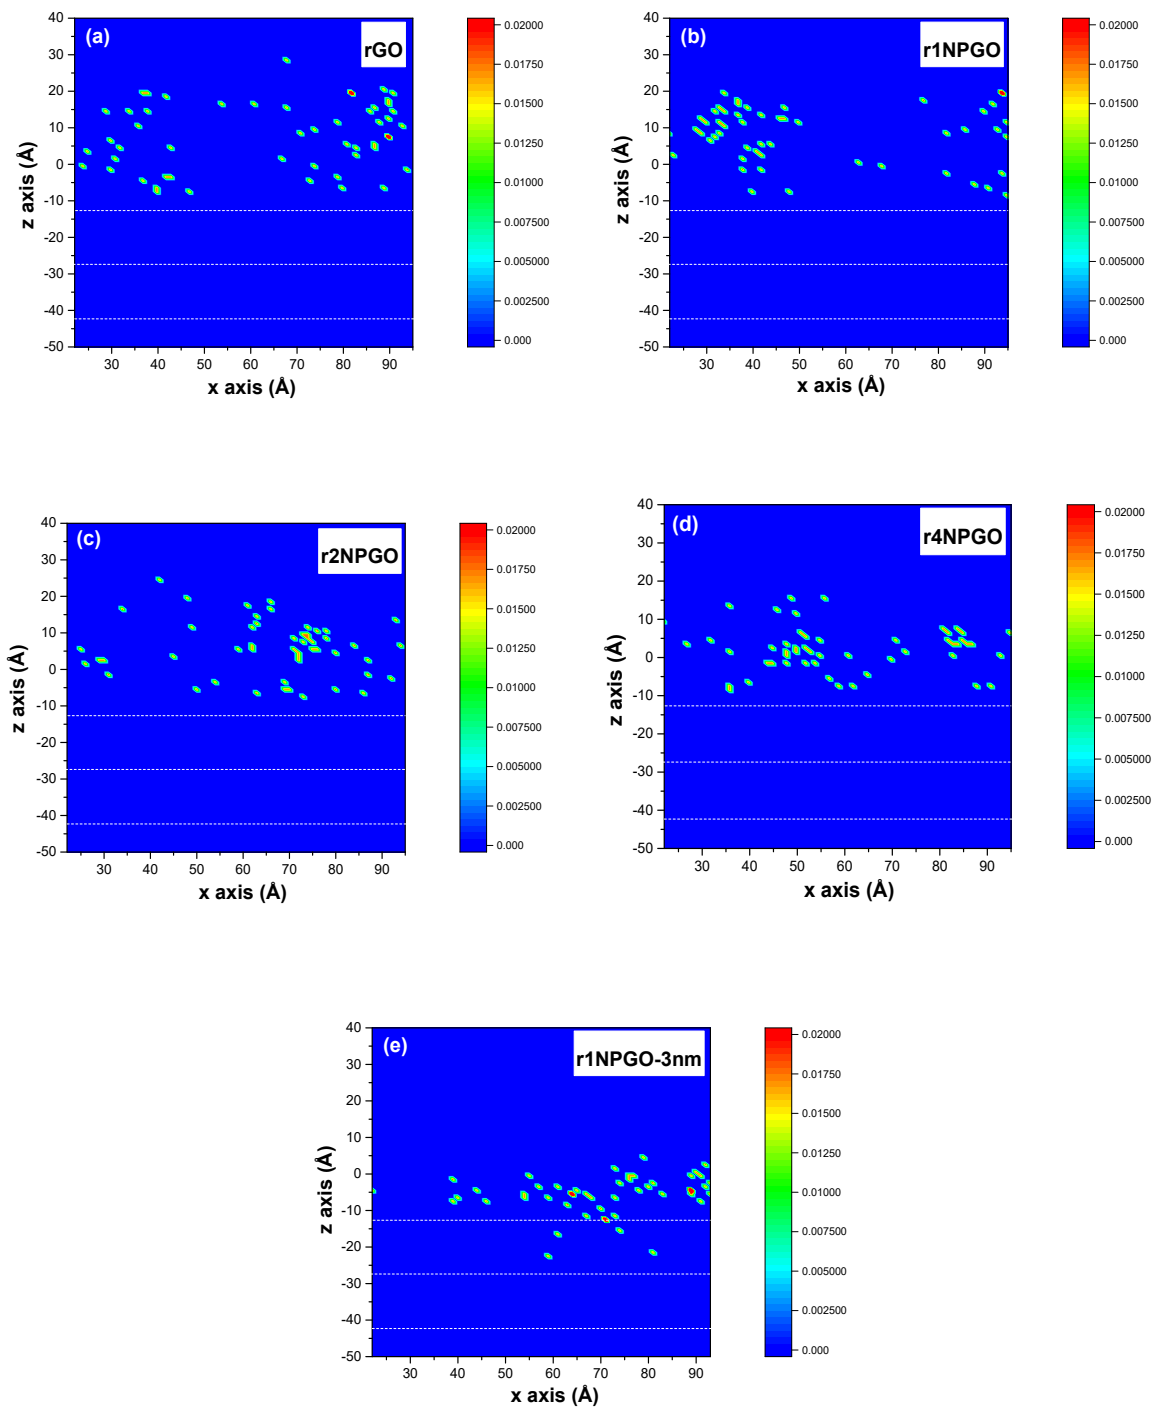

**Figure S5.** The trajectory of 5Cl<sup>-</sup> and 3Na<sup>+</sup> ions over the entire simulation duration for r1NPGO-3nm membrane.

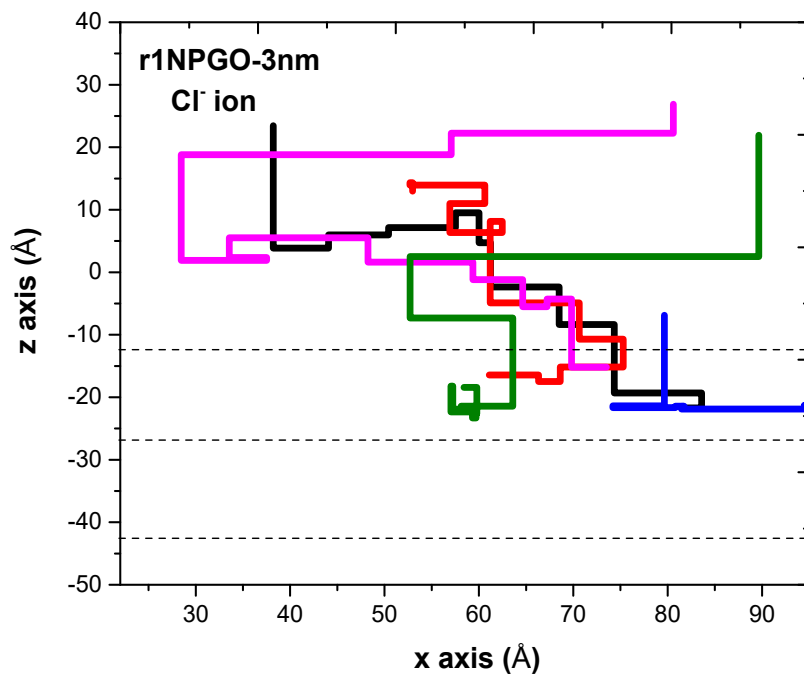

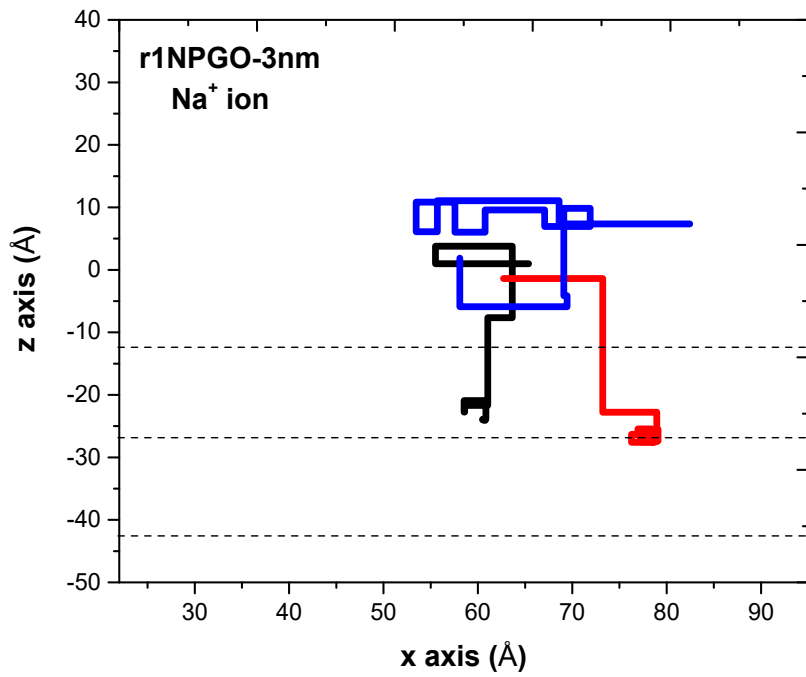



**Figure S6.** Radial distribution functions of Na<sup>+</sup>-Na<sup>+</sup>, Cl<sup>-</sup>-Cl<sup>-</sup>, and Na<sup>+</sup>-Cl<sup>-</sup> for rGO, r1NPGO, r2NPGO, r4NPGO and r1NPGO-3nm membranes at 1 ns and 10 ns.

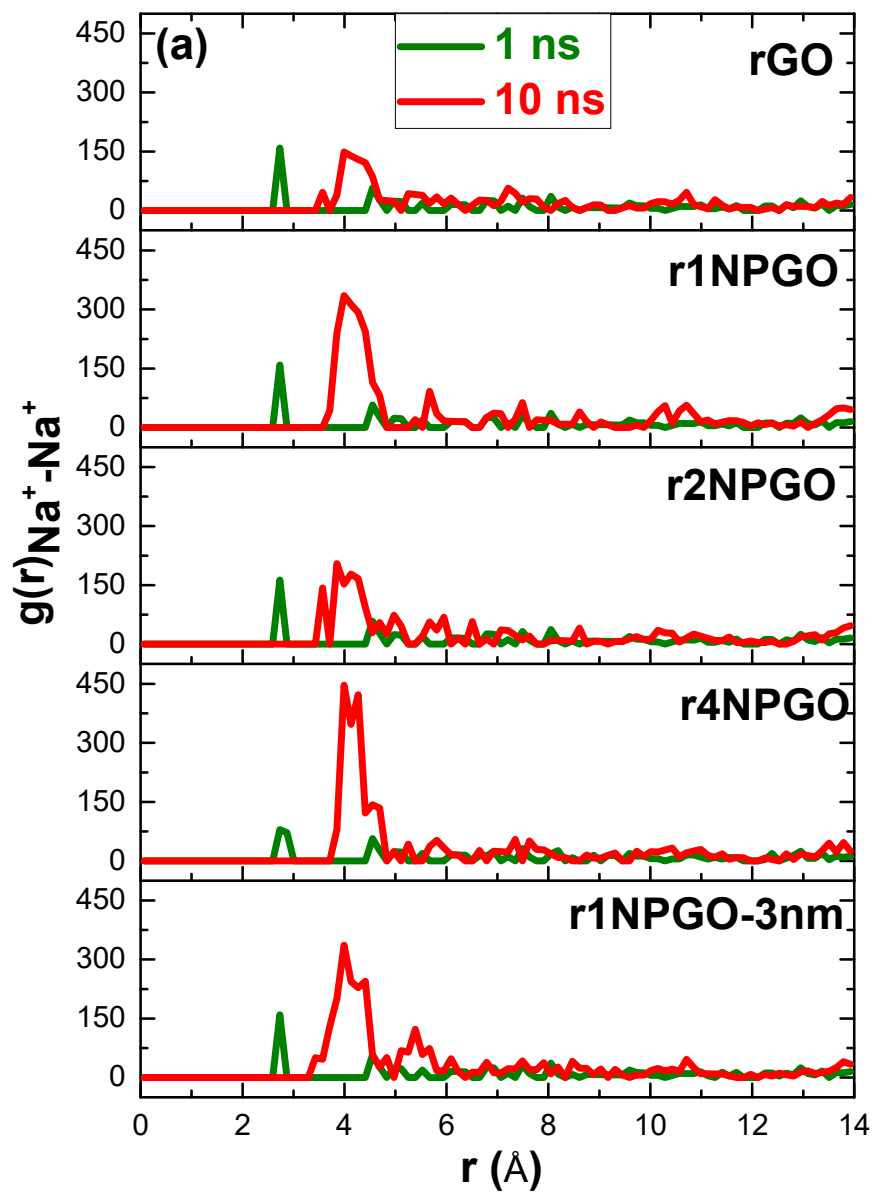

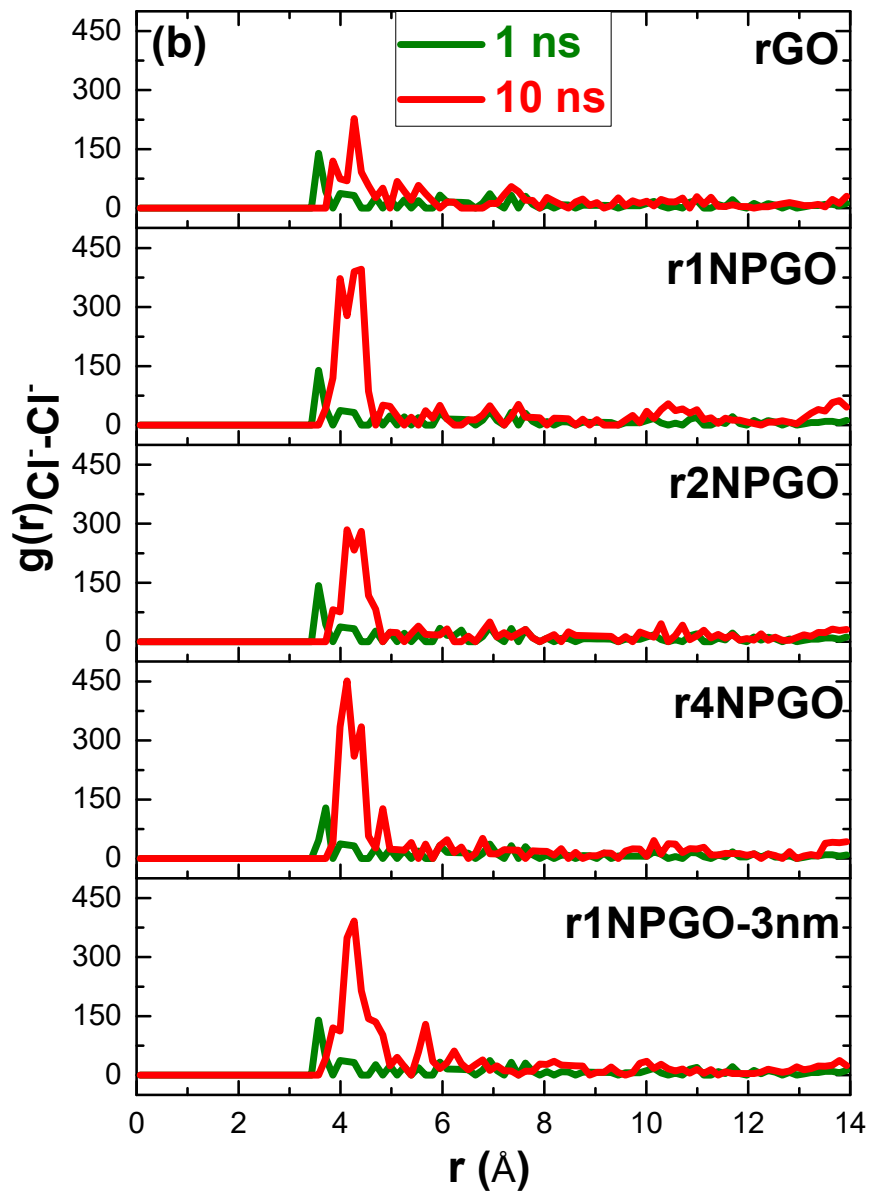

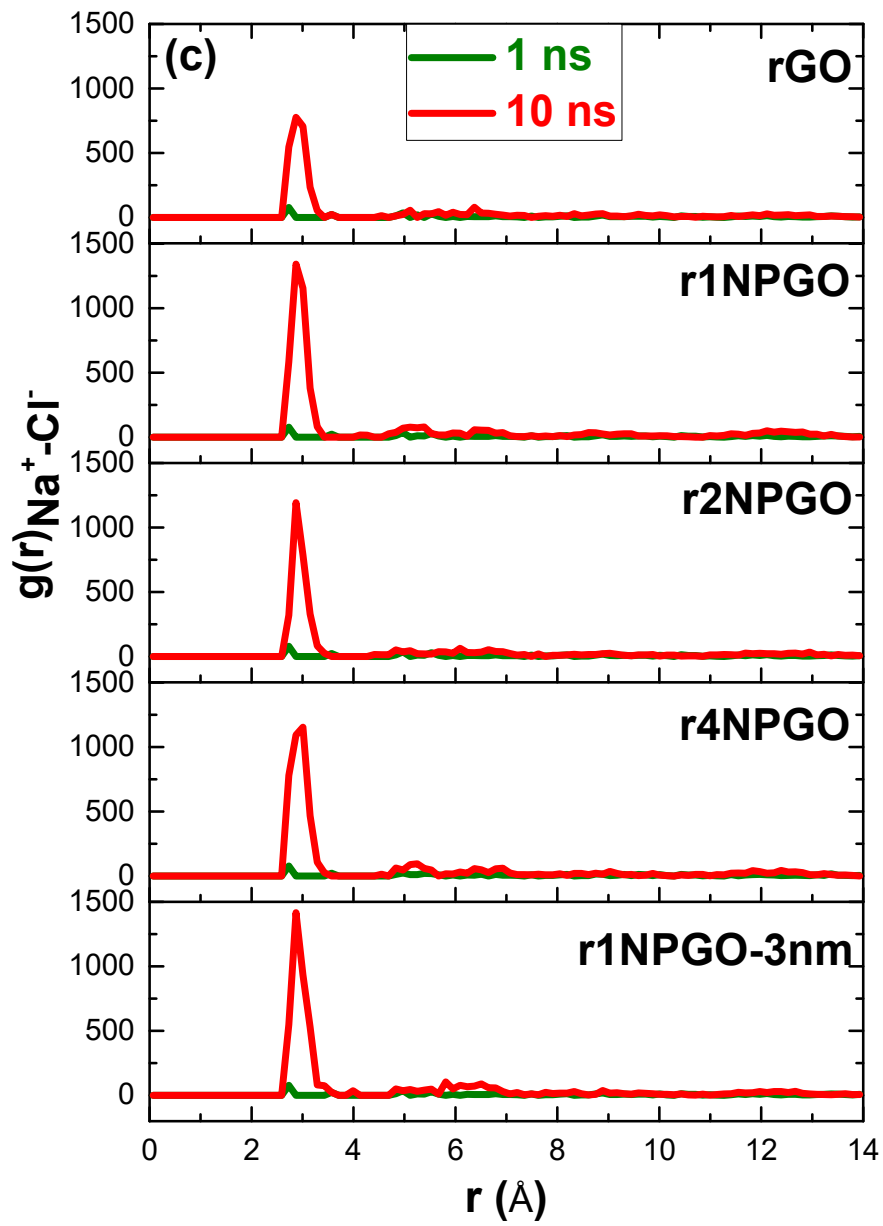

**Figure S7.** Formation of ion clusters from  $\text{Na}^+$  and  $\text{Cl}^-$  ions in (a) rGO, (b) r1NPGO, (c) r2NPGO, (d) r4NPGO, and (e) r1NPGO-3nm at 10 ns. The orange, red, white, purple, and lime spheres represent carbon atoms, oxygen atoms, hydrogen atoms, sodium ions, and chlorine ions, respectively.

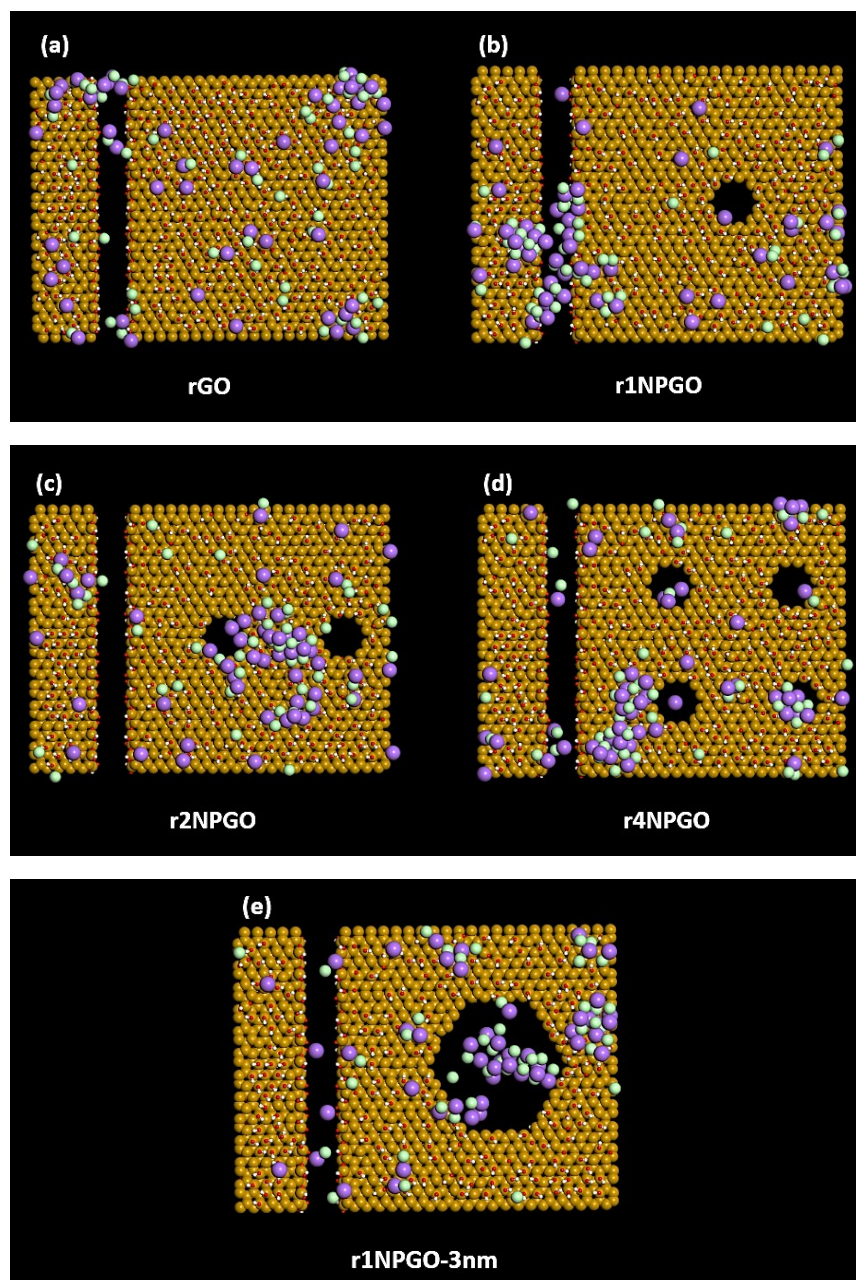

**Figure S8.** Radial distribution functions of  $\text{Na}^+\text{-H}_2\text{O}$ , and  $\text{Cl}^-\text{-H}_2\text{O}$  for rGO, r1NPGO, r2NPGO, r4NPGO and r1NPGO-3nm membranes at 1 ns and 10 ns.

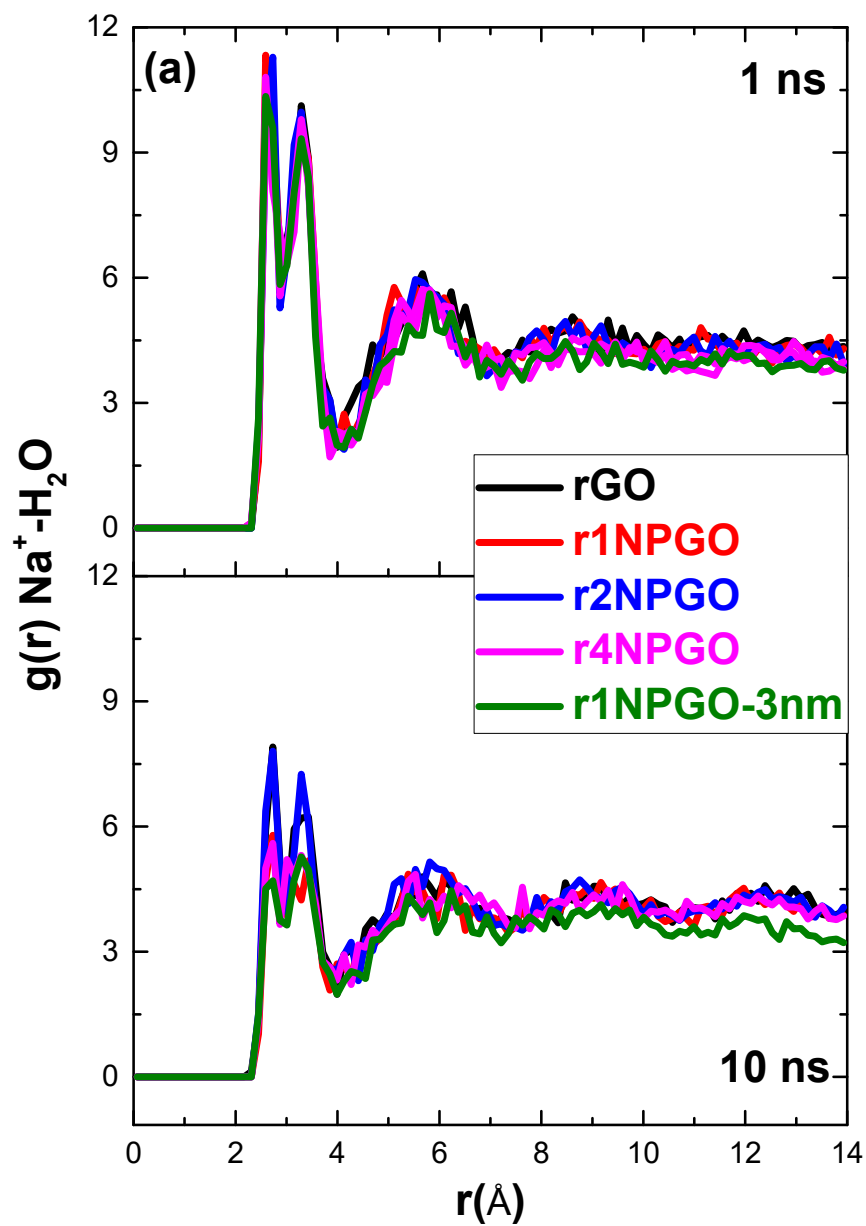

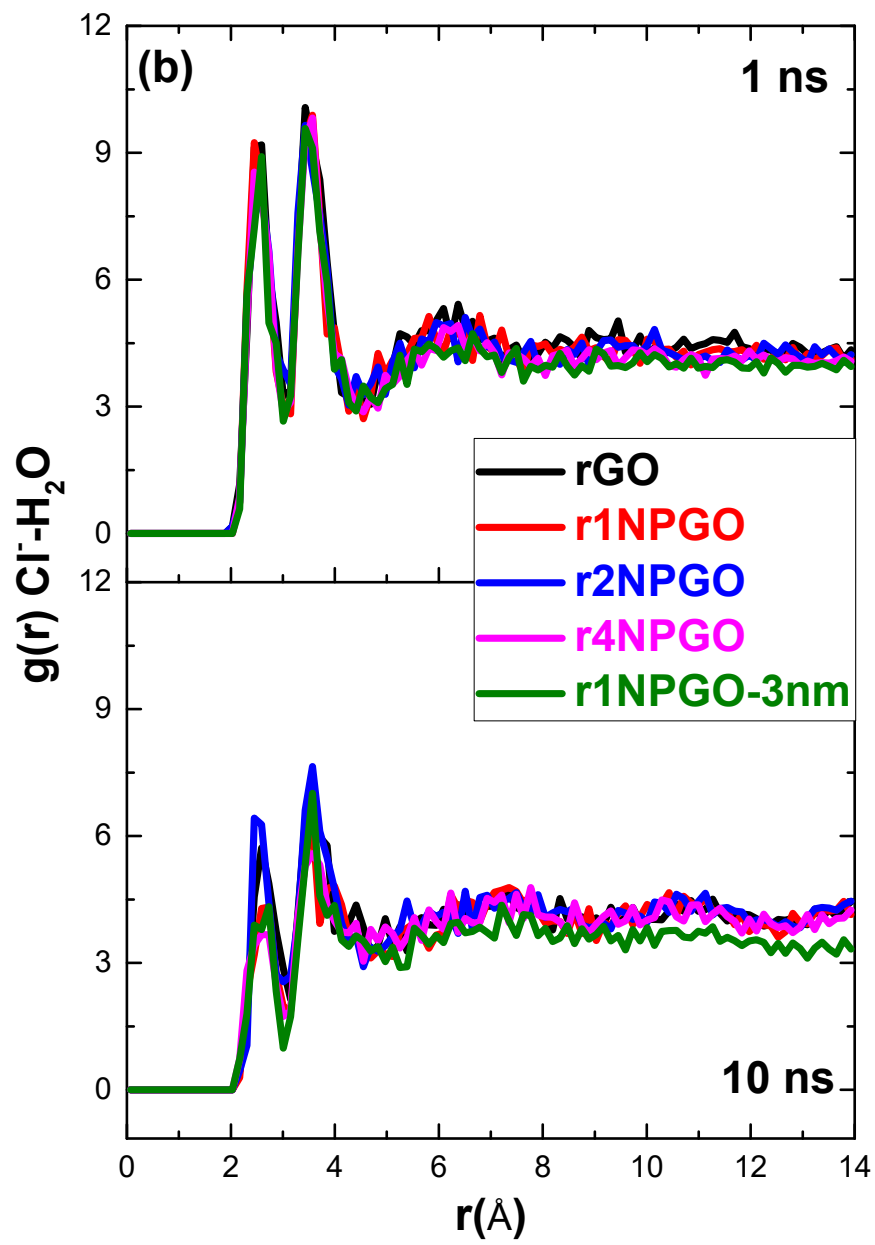

**Figure S9.** Radial distribution functions between  $\text{Na}^+$  and  $\text{Cl}^-$  ions and membrane atoms for rGO, r1NPGO, r2NPGO, r4NPGO and r1NPGO-3nm membranes at 10 ns.

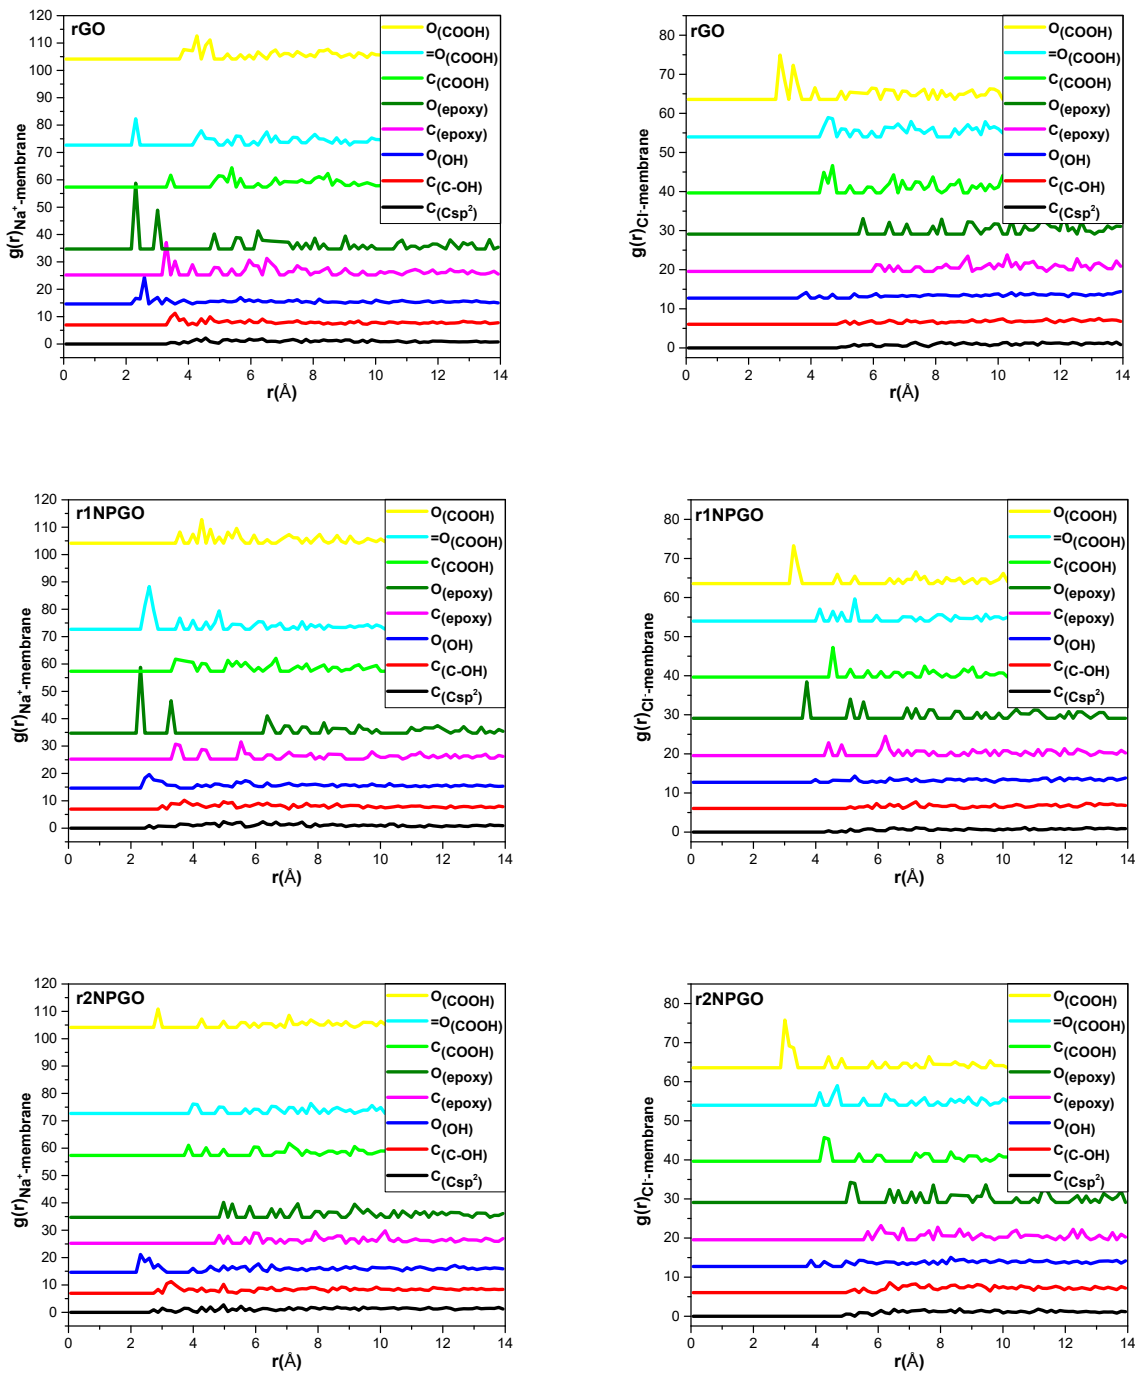

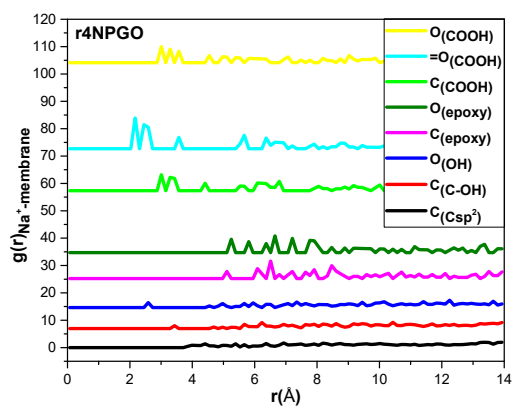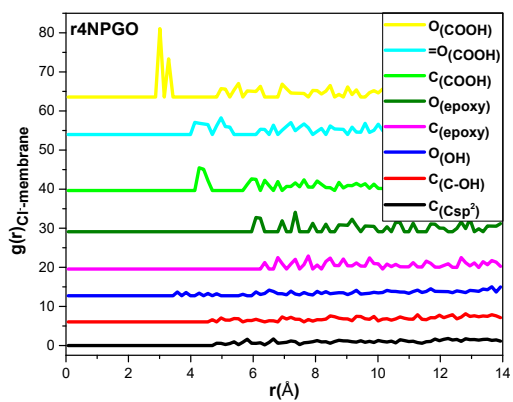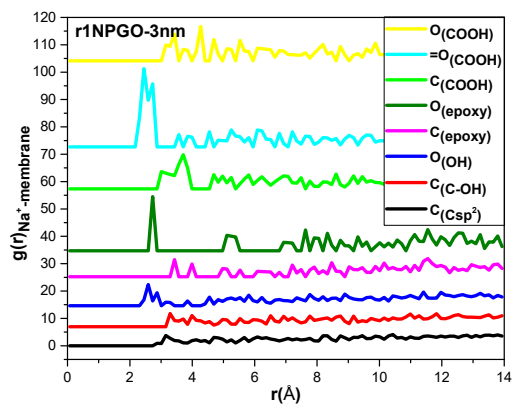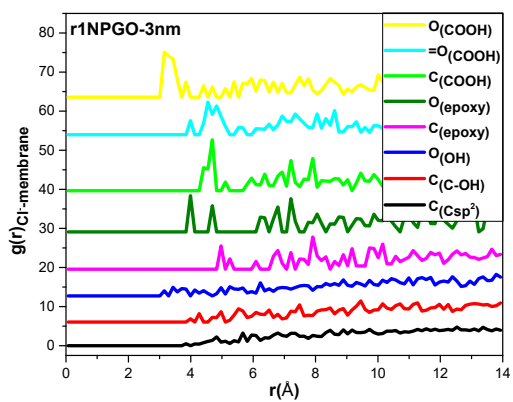

Supplement: d3cp02967k1.pdf [file d3cp02967k1.pdf]
